# Supplementary material for: EphA2 affects the sensitivity of oxaliplatin by inducing EMT in oxaliplatin-resistant gastric cancer cells
Source: PubMed Central journal article supplement (PMC5564621; doi:10.18632/oncotarget.18208), 2017-05-24
Supplement: oncotarget-08-47998-s001.pdf [file oncotarget-08-47998-s001.pdf]

## EphA2 affects the sensitivity of oxaliplatin by inducing EMT in oxaliplatin-resistant gastric cancer cells

### SUPPLEMENTARY INFORMATION

**Supplementary Table 1: EphA2, E-cadherin, N-cadherin, snail and 18S primers**

|            | Primers | Nucleic acid sequence(5'-3') | The product size(bp) |
|------------|---------|------------------------------|----------------------|
| EphA2      | Right   | CTGGCTCACACACCCGTATGGC       | 209                  |
|            | Left    | CGCCACCAGGGAAGCTGTTG         |                      |
| E-cadherin | Right   | CAACGACCCAACCCAAGAA          | 271                  |
|            | Left    | CCGAAGAAACAGCAAGAGCA         |                      |
| N-cadherin | Right   | TTGGTTTGGGGAGGGAGA           | 234                  |
|            | Left    | CTGGGGTCAGAGGTGTATCATT       |                      |
| Snail      | Right   | TGCTCCACAAGCACCAAGA          | 228                  |
|            | Left    | GCAGAGGACACAGAACCAGAAA       |                      |
| 18S        | Right   | AAATAGCCTTTGCCATCACTGC       | 181                  |
|            | Left    | GTTCAAGAACCAGTCTGGGATC       |                      |
